# Supplementary material for: Imidazole-modified deferasirox encapsulated polymeric micelles as pH-responsive iron-chelating nanocarrier for cancer chemotherapy
Source: Royal Society of Chemistry journal article supplement (doi:10.1039/c6ra26669j), 2017-01-01
Supplement: c6ra26669j1.pdf [file c6ra26669j1.pdf]

## Supporting Information

### **Imidazole-modified Deferasirox Encapsulated Polymeric Micelles as pH-responsive Iron-Chelating Nanocarrier for Cancer chemotherapy**

Man Theerasilp<sup>†‡</sup>, Punlop Chalermpanapun<sup>†</sup>, Kanyawan Ponlamuangdee<sup>†</sup>, Dusita Sukvanitvichai<sup>†</sup> and Norased Nasongkla<sup>†‡\*</sup>

<sup>†</sup>Department of Biomedical Engineering, Faculty of Engineering, Mahidol University  
25/25 Puttamonthon, Nakorn Pathom, 73170, Thailand

<sup>‡</sup>Department of Chemistry and Center of Excellence for Innovation in Chemistry, Faculty of  
Science, Mahidol University, 272 Ratchathewi, Bangkok 10400, Thailand

\*Corresponding author: [norased.nas@mahidol.ac.th](mailto:norased.nas@mahidol.ac.th)

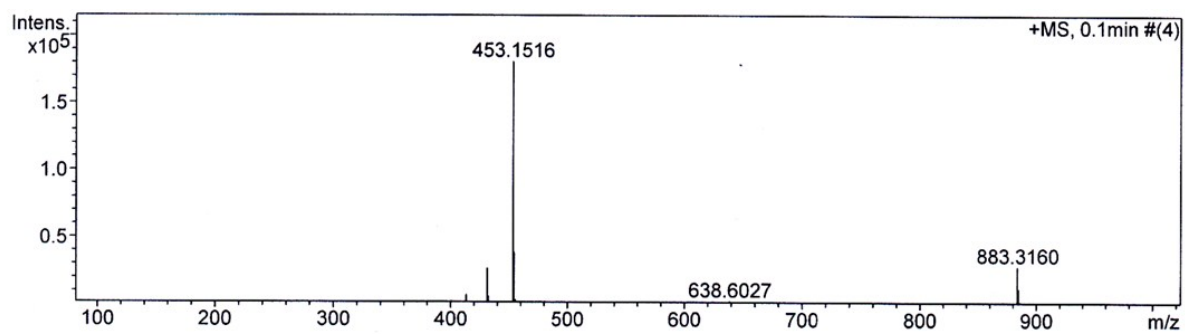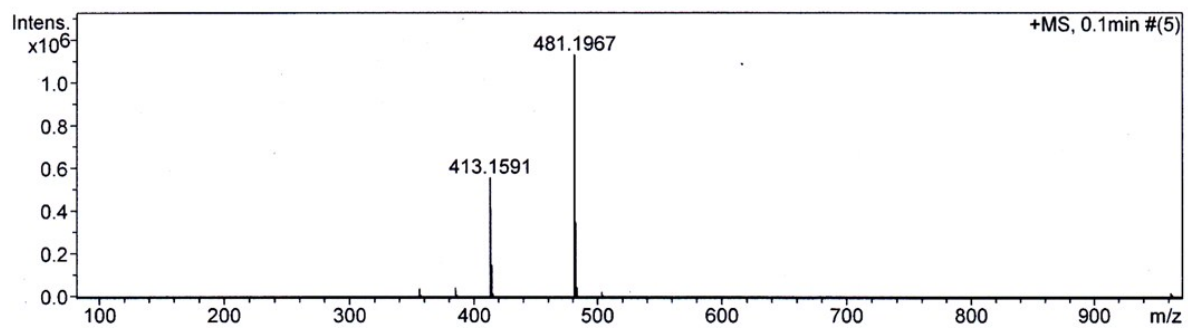

**Fig. S1** Mass spectrum of mDef. ESI-MS calcd for  $C_{24}H_{22}N_4O_4$   $[M]^+$ : 430.16; obsd: 453.15  $[M+Na]^+$  (above) and mass spectrum of iDef. ESI-MS calcd for  $C_{27}H_{24}N_6O_3$   $[M]^+$ : 480.19; obsd: 481.20  $[M+H]^+$  (below).

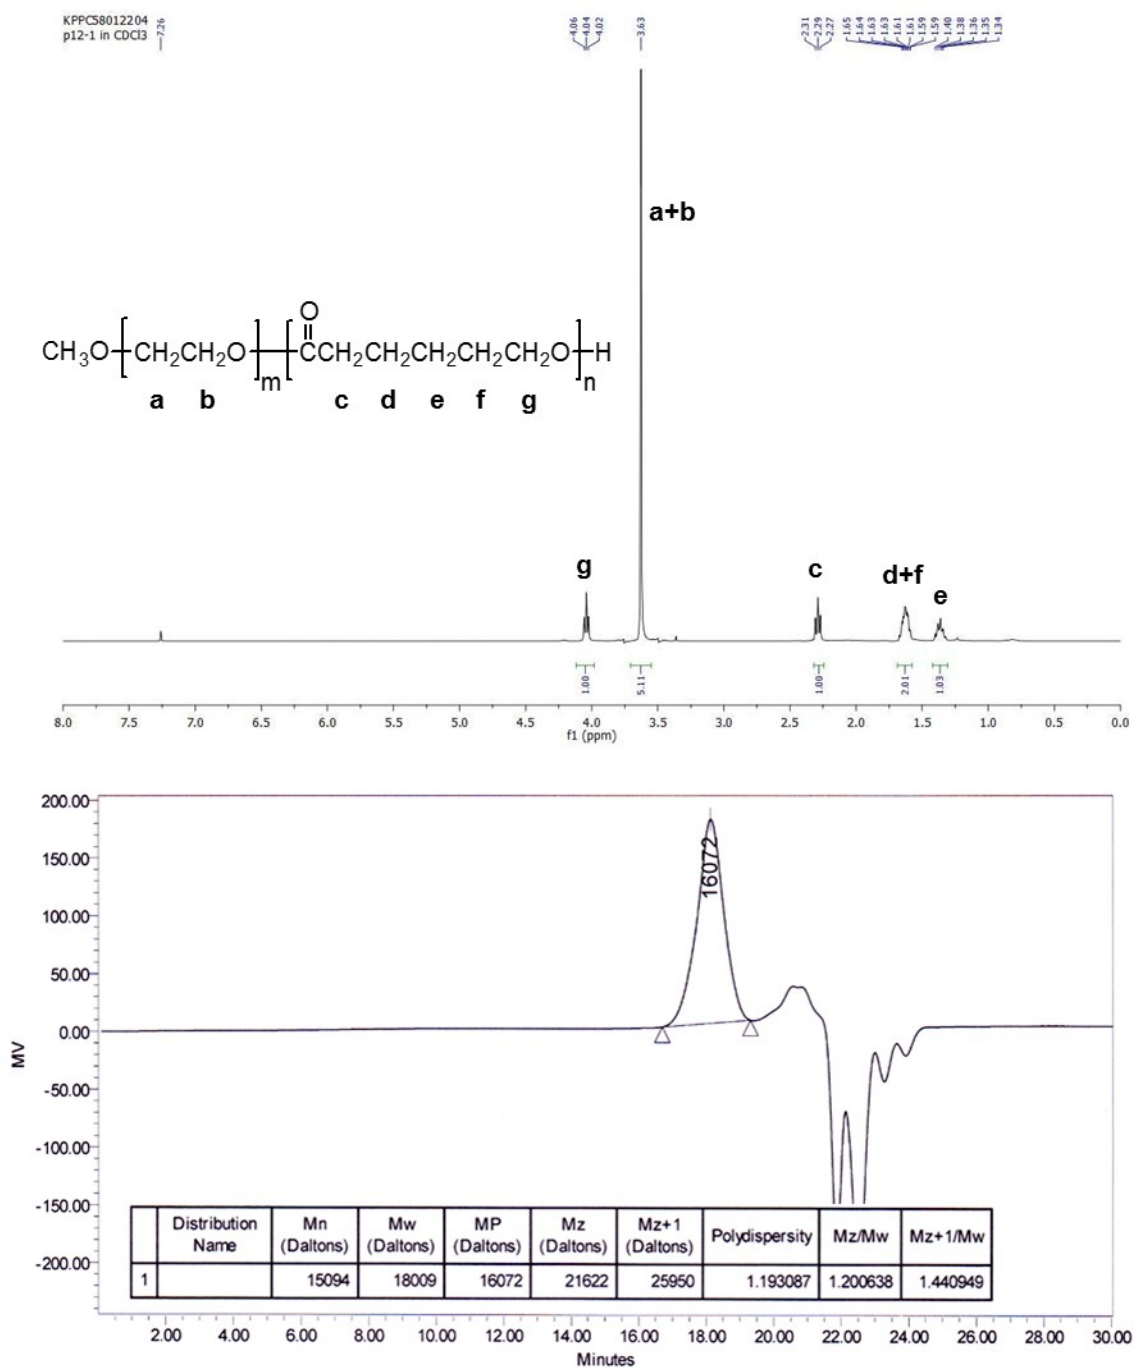

**Fig. S2** <sup>1</sup>H-NMR spectrum of PEG-*b*-PCL (above) and GPC using PS standard (below).

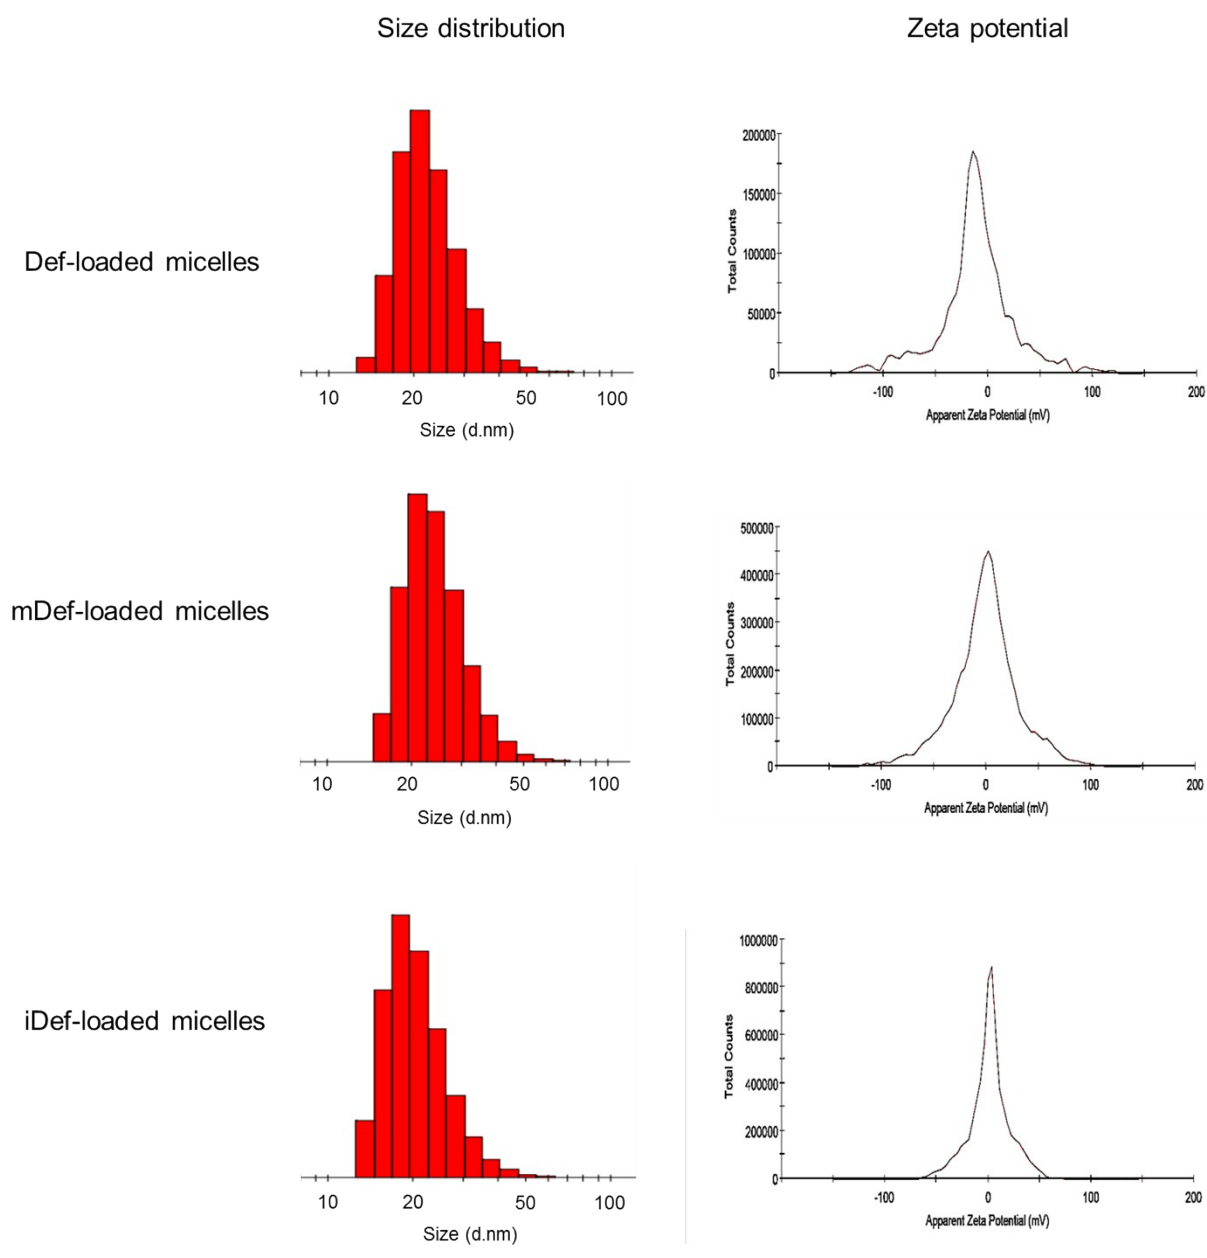

**Fig. S3** Size distribution and zeta potential of Def-, mDef- and iDef-loaded micelles determined by Dynamic Light Scattering.

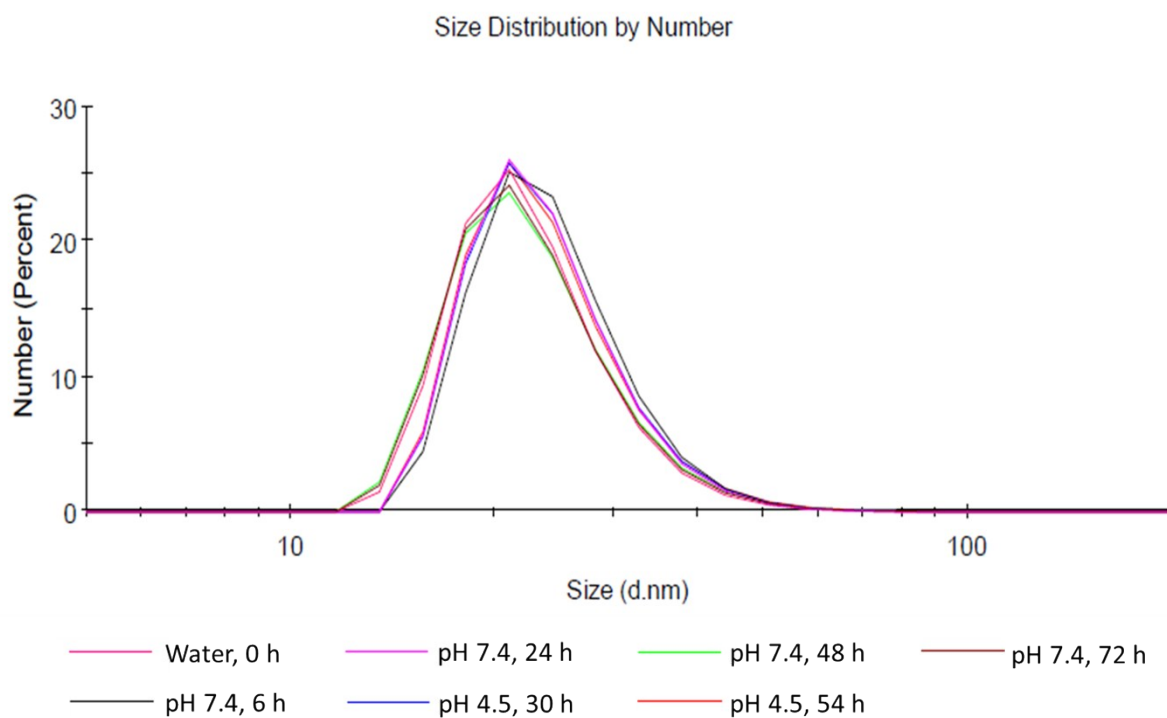

**Fig. S4** Size distribution profile of imidazole-modified deferasirox micelles during switching of pH between 7.4 and 4.5.

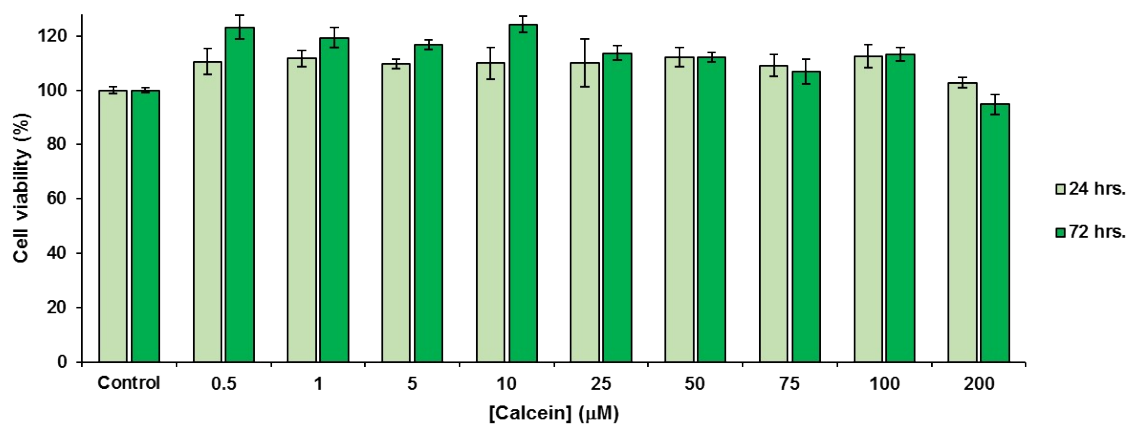

**Fig. S5** Cytotoxicity of calcein against HepG2 cells.
